# Supplementary material
Source: Elsevier journal article supplement (https://www.sciencedirect.com/science/article/pii/S2530064422000220)
Supplement: mmc1 [file S2530064422000220:mmc1.docx]

*Supplementary materials for*

**Network science: applications for sustainable agroecosystems and food security**

Fredric M. Windsora,*, Dolors Armenterasb, Ana Paula A. Assisc, Julia Astegianod, Pamela C. Santanac, Luciano Cagnolod, Luísa G. Carvalheiroe,f, Clive Emaryg, Hugo Forth, Xavier I. Gonzalezi, James J. N. Kitsona, Ana C. F. Lacerdaj, Marcelo Loisk, Viviana Márquez-Velásquezl,m, Kirsten E. Millera, Marcos Monasterolon, Marina Omacinio, Kate P. Maiac, Tania Paula Palaciosk, Michael J. O. Pocockp, Santiago L. Poggioo, Isabela G. Varassinq, Diego P. Vasquezr, Julia Tavellak, Débora C. Rotherc, Mariano Devotok,s, Paulo R. Guimarães Jr.c & Darren M. Evansa,*

a School of Natural and Environmental Sciences, Newcastle University, Newcastle upon Tyne, NE1 7RU, UK.

b Laboratorio de Ecología del Paisaje y Modelación de Ecosistemas ECOLMOD, Departamento de Biología, Facultad de Ciencias, Universidad Nacional de Colombia, Sede Bogotá, Colombia.

c Departamento de Ecologia, Instituto de Biociências, Universidade de São Paulo, São Paulo, 05508-090, Brazil.

d Instituto Multidisciplinario de Biologia Vegetal FCEFyN, Universidad Nacional de Cordoba, CONICET, Cordoba, Argentina.

e Departamento de Ecologia, Universidade Federal de Goiás, Campus Samambaia, Goiânia, Brazil.

f Centre for Ecology, Evolution and Environmental Changes (cE3c), University of Lisboa, Lisbon, Portugal

g School of Mathematics, Statistics and Physics, Newcastle University, Newcastle upon Tyne, NE1 7RU, UK.

h Grupo de Sistemas Complejos y Física Estadística, Facultad de Ciencias, Universidad de la República, Montevideo, Uruguay.

i Departamento de Gestión, Facultad de Ingenieria, Universidad de Buenos Aires, Av. Las Heras 2214, C1127AAR, Buenos Aires, Argentina.

j Departamento de Sistemática e Ecologia, Centro de Ciências Exatas e da Natureza, Universidade Federal da Paraíba, João Pessoa, 58051-900, Brazil.

k Facultad de Agronomía, Universidad de Buenos Aires, Cátedra de Botánica General, Av. San Martín 4453, C1417DSE, Buenos Aires, Argentina.

l Programa de Pós-Graduação em Ciências Biológicas (Zoologia), Universidade Federal da Paraíba, João Pessoa, 58051-900, Brazil.

m IRIS Research Group, Innovation for Resilience, Inclusion and Sustainability, Laboratory of Animal Ecology, Universidade Federal da Paraíba, Campus IV, Rio Tinto, 58297-000, Brazil.

n Centro de Investigaciones y Transferencia de Catamarca, CONICET-UNCA, Prado 366, K4700AAP, San Fernando del Valle de Catamarca, Catamarca, Argentina.

o IFEVA, Facultad de Agronomía, Cátedra de Ecología. Av. San Martín 4453, C1417DSE, Universidad de Buenos Aires, CONICET, Buenos Aires, Argentina.

p UK Centre for Ecology & Hydrology, Wallingford, OX10 8BB, UK.

q Departamento de Botânica, Universidade Federal do Paraná, Curitiba, Paraná, 81531-980, Brazil.

r Instituto Argentino de Investigaciones de las Zonas Áridas, CONICET and Universidad Nacional de Cuyo, Av. Ruiz Leal s/n, 5500 Mendoza, Argentina

s Consejo Nacional de Investigaciones Científicas y Técnicas (CONICET), Argentina

* Correspondence: [fredric.windsor@ncl.ac.uk](mailto:fredric.windsor@ncl.ac.uk) and [darren.evans@ncl.ac.uk](mailto:darren.evans@ncl.ac.uk)

**Table S1. Examples of how networks have previously been used to answer applied questions in agriculture.**

| **Agricultural system** | **Network type** | **Research question** | **Reference** |
| --- | --- | --- | --- |
| Meadow | Plant-pollinator | What is the network structure of a quantitative mutualistic network? | Memmott (1999) |
| Arable fields (Pea, Wheat Triticale and Oilseed rape) | Herbivore-parasitoid | To what extent are Aphidiinae parasitoids shared between in- and off-crop habitats? | Dercoles *et al.* (2014) |
| Tomato fields (organic and inorganic) | Plant-herbivore | Do organic and inorganic tomato crops have different levels of crop damage (herbivory)? | Letourneau & Goldstein (2001) |
| Arable fields, pasture and livestock | Plant-herbivore-parasitoid | Are ecological networks in organic and inorganic farms different, and do organic farms have higher parasitoid species richness? | Macfadyen *et al.* (2009) |
| Abandoned field (Rush meadow) | Herbivore-parasitoid-hyperparasitoid | What is the structure of aphid-parasitoid networks in an abandoned field? | Müller *et al.* (1999) |
| Semi-natural grasslands in agroecosystems (abandoned, extensively managed and intensively managed) | Plant-pollinator  Plant-herbivore | How interaction networks respond to land use change (abandonment and intensification)? | Shinohara *et al.* (2019) |
| Barley fields | Predator-prey (extra- and intra-guild) | How does food web specialisation vary within cropping season? | Roubinet *et al.* (2018) |
| Wheat fields (organic and inorganic) | Herbivore-parasitoid-hyperparasitoid | How do spatio-temporal changes induced by agricultural intensification produce changes in community structure and ecosystem functioning? | Gagic *et al.* (2012) |
| Agricultural landscapes at national scale | Plant-pollinator (inferred) | Do traits enabling persistence in highly agricultural landscapes confer robustness to potential future perturbations on inferred plant–pollinator networks?" | Redhead *et al.* (2018) |
| Arable fields | Invertebrate predation food webs | Does crop type and genetically modified crops influence the core-periphery structure of networks. | Ma *et al.* (2019) |
| Semi-natural grasslands in agroecosystems (grassland restored) | Plant-pollinator | How land use intensification influences the structure of networks? | Marrero *et al.* (2014) |
| Arable fields | Plant-pollinator | How local conditions and landscape structure at multiple scales influences the plant-pollinator networks? | Moreira *et al.* (2015) |
| Agricultural lands and semi-natural grasslands | Pollen transport | How agricultural land management influences the diversity of pollen transported by pollinators? | Marrero *et al.* (2017) |
| Traditional maize-based polyculture in Mexico (milpa fields) | Co-occurrence network of soil microbial communities | What is the composition and structure of soil prokaryotic communities and how they change along the cropping season? | Rebollar *et al.* (2017) |
| Plastic shelters in watermelon plantation field | Co-occurrence network of soil microbial communities | How does the microbial community recover after fumigation and organic fertilizer application for *Fusarium* suppression? | Ge *et al.* (2021) |
| Kiwifruit orchards | Co-occurrence network of soil microbial communities | How does the community composition change under long-term organic fertilization regimes? | Liu *et al.* (2020) |
| Arid soils under grazing disturbance | Co-occurrence network of soil microbial communities | How does the network change in soil under grazed and non-grazed conditions? | Marcos *et al.* (2019) |
| Organically and conventionally organic field soils | Co-occurrence network of microbial soil communities | How does different agricultural management practices select for different bacteria and fungal species and communities? | Hartmann *et al.* (2015) |
| Arable fields | Caterpillar-parasitoid food webs | How do food web parameters differ in perennial and annual crops? | Avalos *et al.* (2020) |
| Rice fields *agroforests | Plant-bee pollination networks | How different agricultural systems (rice fields and agroforests) and landscape affect pollinator communities and networks? | Hass *et al.* (2018) |
| Farms in a gradient of agricultural intensification | Cavity nesting bees–plants and wasps–prey and bees/wasps–antagonists | How agricultural intensification affects different groups of species and different types of interactions? | Martínez‐Núñez & Rey (2021) |
| Farms in a gradient of agricultural intensification | herbivore-plant-pollinator networks | How agricultural intensification gradient changes network structure and robustness to local extinctions? | Morrison *et al.* (2020) |
| Farms in a gradient of agricultural intensification | Pollination and herbivory networks | Does agricultural intensification have different impacts on the network topology of mutualistic and antagonistic networks? | Morrison & Dirzo (2020) |
| Herbaceous semi‐natural habitats | Plant-pollinator networks | How enhancing key floral resources may promote conservation of rare species and economically important crop pollinators? | Sutter *et al.* (2017) |
| Oilseed and ley managed habitats | Host-parasitoid | How does land-use intensity impact the potential for apparent competition within and between crop habitats | Miller *et al.* (2021) |

**References**

Avalos, S., González, E., Mangeaud, A., Valladares, G., 2020. Caterpillar-parasitoid food webs and biological control in two extensive crops. Biol. Control. 143, 104184. https://doi.org/10.1016/j.biocontrol.2019.104184

Derocles, S. A. P., Le Ralec, A., Besson, M. M., Maret, M., Walton, A., Evans, D. M., Plantegenest, M., 2014. Molecular analysis reveals high compartmentalization in aphid-primary parasitoid networks and low parasitoid sharing between crop and noncrop habitats. Mol. Ecol. 23, 3900–3911. https://doi.org/10.1111/mec.12701

Gagic, V., Hänke, S., Thies, C., Scherber, C., Tomanović, Ž., Tscharntke, T., 2012. Agricultural intensification and cereal aphid-parasitoid-hyperparasitoid food webs: Network complexity, temporal variability and parasitism rates. Oecologia 170, 1099–1109. https://doi.org/10.1007/s00442-012-2366-0

Ge, A., Liang, Z-H., Xiao, J-L., Zhang, Y., Zeng, Q., Xiong, C., Han, L-L., Wang, J-T., Zhang, L-M., 2021. Microbial assembly and association network in watermelon rhizosphere after soil fumigation for Fusarium wilt control. Agric. Ecosyst. Environ. 312, 107336. https://doi.org/10.1016/j.agee.2021.107336

Hartmann M., Frey, B., Mayer, J., Mäders, P., Widmer, F., 2015. Distinct soil microbial diversity under long-term organic and conventional farming. ISME J. 9, 1177–94. https://doi.org/10.1038/ismej.2014.210

Hass, A. L., Liese, B., Heong, K. L., Settele, J., Tscharntke, T., Westphal, C., 2018. Plant-pollinator interactions and bee functional diversity are driven by agroforests in rice-dominated landscapes. Agric. Ecosyst. Environ. 253, 140–147. https://doi.org/10.1016/j.agee.2017.10.019

Letourneau, D. K., Goldstein, B., 2001. Pest damage and arthropod community structure in organic vs. conventional tomato production in California. J. Appl. Ecol. 38, 557–570. https://doi.org/10.1046/j.1365-2664.2001.00611.x

Liu, Z., Guo, Q., Feng, Z., Liu, Z., Li, H., Sun, Y., Liu, C., Lai, H., 2020. Long-term organic fertilization improves the productivity of kiwifruit (Actinidia chinensis Planch.) through increasing rhizosphere microbial diversity and network complexity. App. Soil Ecol. 147, 103426. https://doi.org/10.1016/j.apsoil.2019.103426

Ma, A., Lu, X., Gray, C., Raybould, A., Tamaddoni-Nezhad, A., Woodward, G., Bohan, D. A., 2019. Ecological networks reveal resilience of agro-ecosystems to changes in farming management. Nat. Ecol. Evol. 3, 260–264. https://doi.org/10.1038/s41559-018-0757-2

Macfadyen, S., Gibson, R., Polaszek, A., Morris, R. J., Craze, P. G., Planqué, R., Symondsen, W.O.C., Memmott, J., 2009. Do differences in food web structure between organic and conventional farms affect the ecosystem service of pest control? Ecol. Lett. 12, 229–238. https://doi.org/10.1111/j.1461-0248.2008.01279.x

Marcos, M. S., Bertiller, M. B., Oliveira, N. L., 2019. Microbial community composition and network analyses in arid soils of the Patagonian Monte under grazing disturbance reveal an important response of the community to soil particle size. App. Soil Ecol. 138, 223-323. https://doi.org/10.1016/j.apsoil.2019.03.001

Marrero, H. J., Torretta, J. P., Medan, D., 2014. Effect of land use intensification on specialization in plant–floral visitor interaction networks in the Pampas of Argentina. Agric. Ecosyst. Environ. 188, 63-71. https://doi.org/10.1016/j.agee.2014.02.017

Marrero, H.J., Torretta, J. P., Vázquez, D. P., Hodara, K., Medan, D., 2017. Exotic plants promote pollination niche overlap in an agroecosystem. Agric. Ecosyst. Environ. 239, 304-309. https://doi.org/10.1016/j.agee.2017.01.027

Martínez‐Núñez, C., Rey, P. J., 2021. Hybrid networks reveal contrasting effects of agricultural intensification on antagonistic and mutualistic motifs. Funct. Ecol. 35, 1341–152. https://doi.org/10.1111/1365-2435.13800

Memmott, J. The structure of a plant-pollinator food web. Ecol. Lett. 2, 276–280 (1999). https://doi.org/10.1046/j.1461-0248.1999.00087.x

Miller, K. E., Aguilera, G., Bommarco, R., Roslin, T., 2021. Land-use intensity affects the potential for apparent competition within and between habitats. J. Anim. Ecol. 90, 1891-1905. https://doi.org/10.1111/1365-2656.13508

Moreira, E. F., Boscolo, D., Viana, D. F., 2015. Spatial heterogeneity regulates plant-pollinator networks across multiple landscape scales. PLoS ONE 10, 1-19. https://doi.org/10.1371/journal.pone.0123628

Morrison, B. M. L., Dirzo, R., 2020. Distinct responses of antagonistic and mutualistic networks to agricultural intensification. Ecology 101, e03116. https://doi.org/10.1002/ecy.3116

Morrison, B. M. L., Brosi, B. J., Dirzo, R., 2020. Agricultural intensification drives changes in hybrid network robustness by modifying network structure. Ecol. Lett. 23, 359–369. https://doi.org/10.1111/ele.13440

Müller, C. B., Adriaanse, I. C. T., Belshaw, R., Godfrey, H. C. J., 1999. The structure of an aphid-parasitoid community. J. Anim. Ecol. 68, 346–370. https://doi.org/10.1046/j.1365-2656.1999.00288.x

Rebollar, E.A., Sandoval-Castellanos, E., Roessler, K., Gaut, B. S., Alcaraz, L. D., Benítez, M., Escalante, A. E., 2017. Seasonal changes in a maize-based polyculture of central Mexico reshape the co-occurrence networks of soil bacterial communities. Front. Microbiol. 8, 2478. https://doi.org/10.3389/fmicb.2017.02478

Redhead, J. W., Woodcock,B. A., Pocock, M. J. O., Pywell, R. F., Vanbergen, A. J., Oliver, T. H., 2018. Potential landscape-scale pollinator networks across Great Britain: structure, stability and influence of agricultural land cover. Ecol. Lett. 21, 1821–1832. https://doi.org/10.1111/ele.13157

Roubinet, E., Jonsson, Malsher, G., Staudacher, K., Traugott, M., Ekbom, B., Jonsson, M., 2018. High redundancy as well as complementary prey choice characterize generalist predator food webs in agroecosystems. Sci. Rep. 8, 1–10. https://doi.org/10.1038/s41598-018-26191-0

Shinohara, N., Uchida, K., Yoshida, T., 2019. Contrasting effects of land‐use changes on herbivory and pollination networks. Ecol. Evol. 9, 13585–13595. https://doi.org/10.1002/ece3.5814

Sutter, L., Jeanneret, P., Bartual, A. M., Bocci, G., Albrecht, M., 2017. Enhancing plant diversity in agricultural landscapes promotes both rare bees and dominant crop-pollinating bees through complementary increase in key floral resources. J. App. Ecol. 54, 1856–1864. https://doi.org/10.1111/1365-2664.12907
